# Supplementary material
Source: PubMed Central journal article supplement (PMC1855708)
Supplement: jbacter_189_5_1655__1.pdf [file jbacter_189_5_1655__1.pdf]

Table S1: all adaptor primers for adaptor RT-PCR experiments. The adaptor primer sequence is separated by a vertical line from the sequence complementary to the plasmid. Yes/no in the last column indicates if a PCR product was obtained using the specified adaptor primer.

|                                     |        |                                           |                 |
|-------------------------------------|--------|-------------------------------------------|-----------------|
| cotranscript<br><i>orf56/orf904</i> | F_rev  | TAATACGACTCACTATAGGG CTTATGTCCATAGTGTCCAA | no              |
|                                     | L_rev  | TAATACGACTCACTATAGGG TTATCACGGTTGTCATGCTG | no              |
|                                     | S_rev  | TAATACGACTCACTATAGGG ACTATGGACATAAATTGGTC | no              |
|                                     | T_rev  | TAATACGACTCACTATAGGG TTATTGTCCCACCGTGTATC | no              |
|                                     | AA_rev | TAATACGACTCACTATAGGG TCAATCAAACCGCACGTGCT | yes             |
| transcript <i>orf80</i>             | K_rev  | TAATACGACTCACTATAGGG ACGCATCAGGTAACGATA   | no              |
|                                     | X_rev  | TAATACGACTCACTATAGGG TTGAATAATATACAGTAAAG | no              |
|                                     | O_rev  | TAATACGACTCACTATAGGG AAGGGAGCGTGGAAAAATAG | yes             |
| transcript<br>cto904                | Y_for  | TAATACGACTCACTATAGGG AATGGGTAGACCATACAAAC | no              |
|                                     | G_for  | TAATACGACTCACTATAGGG AAAGAGTATTTAGACAATCA | yes             |
|                                     | R_for  | TAATACGACTCACTATAGGG GCAGGCTGGCAATTAAGAG  | yes             |
|                                     | U_for  | TAATACGACTCACTATAGGG GACAGATTAATGGAAATCGC | yes             |
| transcript<br>cto90a                | P_for  | TAATACGACTCACTATAGGG CCATATGAGTGATCTGAAGG | no              |
|                                     | I_for  | TAATACGACTCACTATAGGG CACGACTCCATAAAAAAGGC | yes             |
|                                     | V_for  | TAATACGACTCACTATAGGG ATCTTGTCAAACCCTGGAAG | yes             |
| transcript<br>cto90b                | Q_for  | TAATACGACTCACTATAGGG CTTTACTCTTTATCTACAGC | no              |
|                                     | W_for  | TAATACGACTCACTATAGGG CTGATTTTTCTCACGATTC  | no              |
|                                     | J_for  | TAATACGACTCACTATAGGG CTTTGATTATCTTAGACAAT | yes             |
| control primer<br>( <i>orf72</i> )  | M_for  | TAATACGACTCACTATAGGG TCTTCTTAGCTTTTGCTCTC | neg.<br>control |
|                                     | N_rev  | TAATACGACTCACTATAGGG AATCAAAGATTGGGTTAGCA |                 |
